# Supplementary material for: Development of a reusable fluorescent nanosensor based on rhodamine B immobilized in Stöber silica for copper ion detection
Source: Royal Society of Chemistry journal article supplement (doi:10.1039/d1ay00168j), 2021-01-01
Supplement: d1ay00168j1.pdf [file d1ay00168j1.pdf]

## Supplementary Information

### Development of a reusable fluorescent nanosensor based on rhodamine B immobilized in Stöber silica for copper ion detection

Rafael S. Fernandes<sup>a\*</sup> and Ivo M. Raimundo Jr.<sup>b</sup>

<sup>a</sup>Institute of Chemistry, Federal University of Rio Grande do Norte, 59072-970, Natal, Brazil.

<sup>b</sup>Institute of Chemistry, University of Campinas, PO Box 6154, 13083-970, Campinas, Brazil.

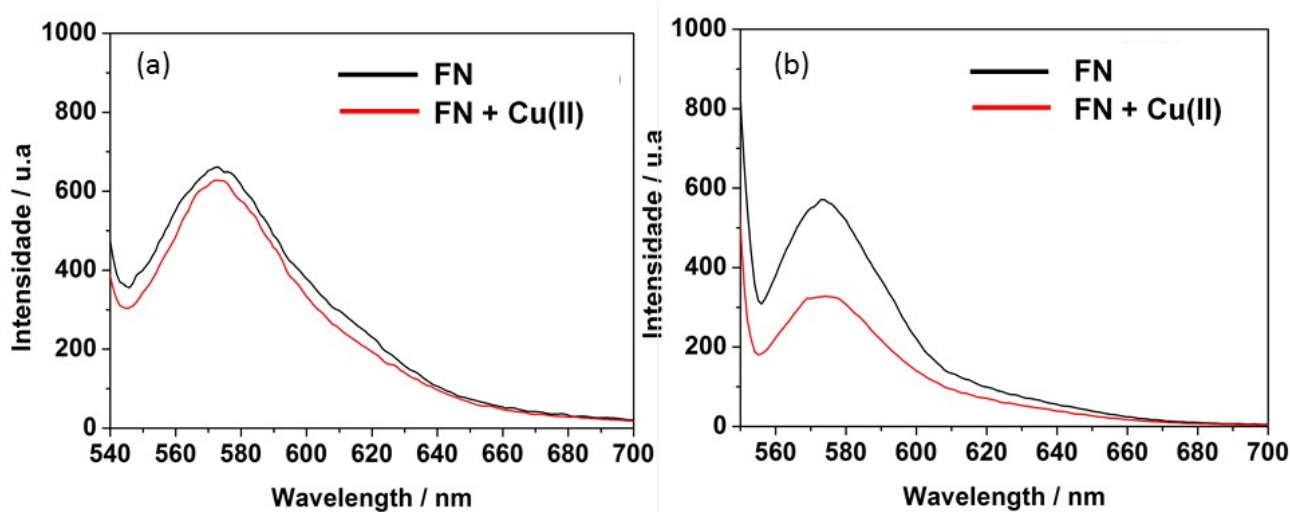

**Figure S1.** Emission spectra of FN. (left) FN (high ammonia concentration) without response to the Cu(II) ion, (right) FN (low ammonia concentration) with response to the Cu(II). Excitation at 535 nm, excitation and emission slits of 20 and 5 nm, respectively. [Cu (II)] = 10  $\mu\text{mol L}^{-1}$ , pH 7.0 ([FN] = 0.43  $\text{mg mL}^{-1}$ ).

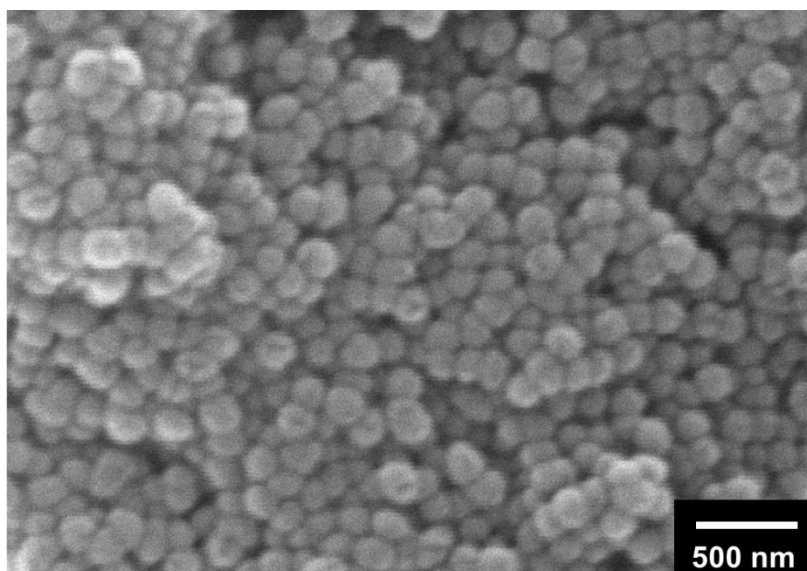

**Figure S2.** SEM of silica nanoparticles without immobilization of the Rhodamine B.
